# Supplementary material for: Methods for simultaneously identifying coherent local clusters with smooth global patterns in gene expression profiles
Source: Springer Nature journal article supplement (doi:10.1186/1471-2105-9-155), 2008-03-20

(a)

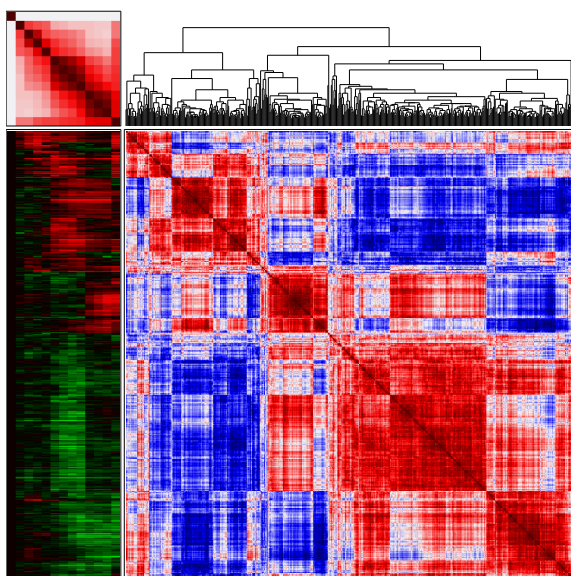

Correlation  
-1 0 +1

(b)

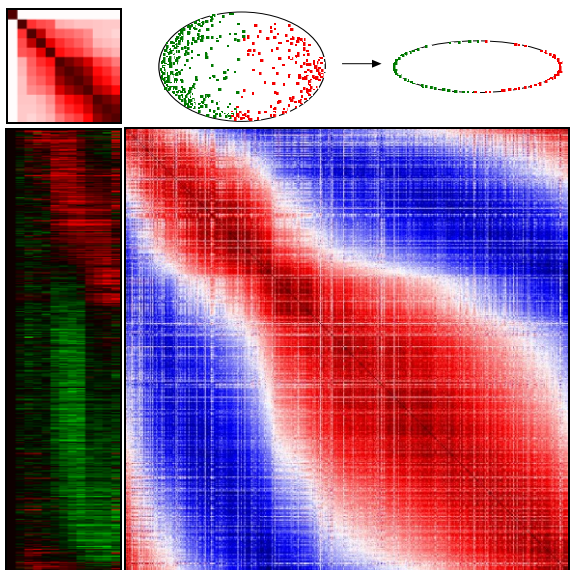

Expression  
-8 0 +8

(c)

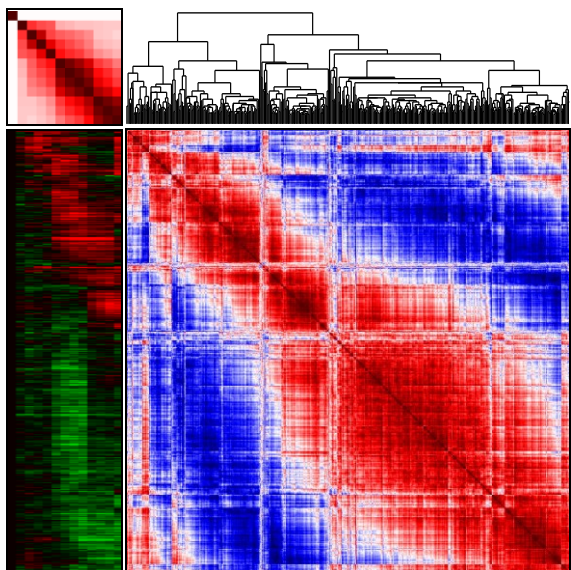

Supplement: 12859_2007_2140_MOESM3_ESM.pdf [file 12859_2007_2140_MOESM3_ESM.pdf]
