# Supplementary material for: Methods for simultaneously identifying coherent local clusters with smooth global patterns in gene expression profiles
Source: Springer Nature journal article supplement (doi:10.1186/1471-2105-9-155), 2008-03-20
Supplement: 12859_2007_2140_MOESM9_ESM.pdf [file 12859_2007_2140_MOESM9_ESM.pdf]

0. Given a gene-by-array expression profile matrix,  $M_{g \times p}$ , with  $g$  genes and  $p$  arrays. The following process can be applied for either gene or array grouping and sorting.
1. Compute the gene-by-gene proximity (e.g., correlation, Euclidean distance, etc.) matrix  $R_{g \times g}$ , (Figure 3a).
2. Select an HCT linkage type (e.g., single, complete, average, centroid, etc.) and construct the hierarchical clustering tree,  $HCT$ , for  $R_{g \times g}$  with  $g$  terminal nodes,  $T_i$  ( $i=1, \dots, g$ ), and  $g-1$  intermediate nodes,  $N_j$  ( $j=1, \dots, g-1$ ). We further define  $N_j^T$  ( $j=1, \dots, g-1$ ) the set of terminal nodes spanned by intermediate node  $N_j$ , (Figure 3b).
3. Apply the converging sequence of iteratively formed correlation matrices [1] to  $R_{g \times g}$  and obtain the rank-two ellipse seriation,  $R2E$ , for  $R_{g \times g}$ . Define relative positions ( $1, \dots, g$ ) of the  $g$  terminal nodes,  $T_i$  ( $i=1, \dots, g$ ), in  $R2E$  as  $O_i$  ( $i=1, \dots, g$ ) and define  $N_j^O$  ( $j=1, \dots, g-1$ ) the set of relative positions of terminal nodes spanned by intermediate node  $N_j$ , (Figures 3c and 3b).
4. Use  $R2E$  as an external reference to guide the flipping mechanism of  $HCT$  to obtain the final flipped tree,  $HCT\_R2E$ . For an intermediate node  $N_j$  with two sub-nodes  $N_{j1}$  and  $N_{j2}$ , assign  $N_{jk}$  as the upper sub-node of  $N_j$  if  $\text{mean}(N_{jk}^O) = \min(\text{mean}(N_{j1}^O), \text{mean}(N_{j2}^O))$ , (Figure 3d).
5. Sort  $M_{g \times p}$  according to the relative terminal node positions of  $HCT\_R2E$ , (Figure 3d).
